# Supplementary material
Source: Springer Nature journal article supplement (https://www.springermedizin.de/resource/supplementary/12955_2010_703_MOESM1_ESM.pdf/9561142)

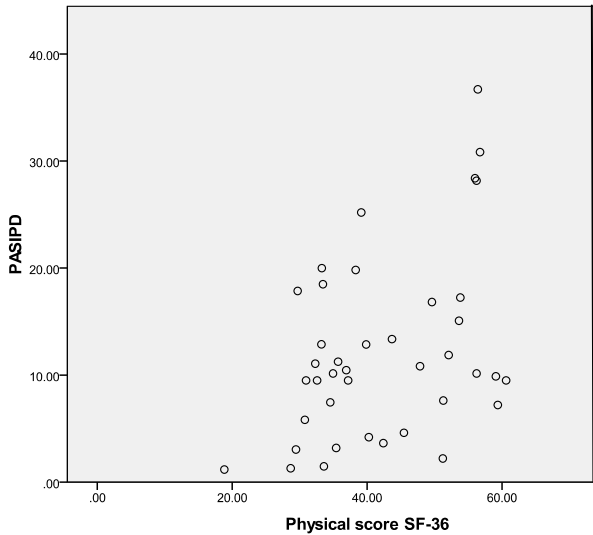

$r=0.33, p=0.037$

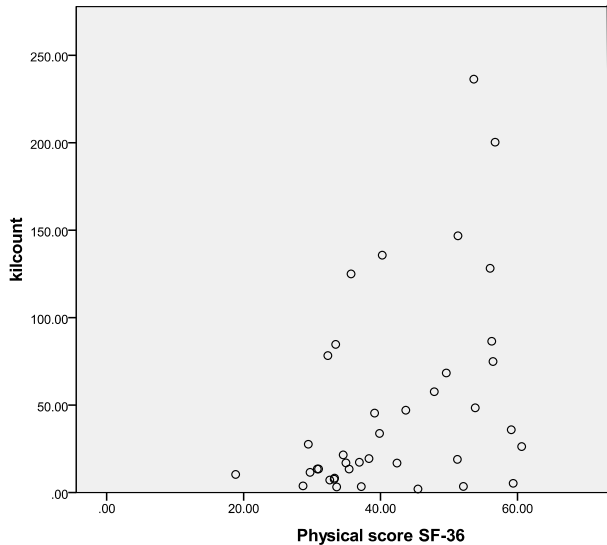

$r=0.42, p=0.008$

Supplement: MOESM1 [file 9561142]
